# Supplementary material for: A defect engineered p-block SnS2−xcatalyst for efficient electrocatalytic NO reduction to NH3
Source: Royal Society of Chemistry journal article supplement (doi:10.1039/d2qi02118h), 2022-11-10
Supplement: d2qi02118h1.pdf [file d2qi02118h1.pdf]

## Experimental Section

### Synthesis of $\text{SnS}_{2-x}/\text{CC}$

All the chemicals were used as received without further purification. Typically, a piece of carbon cloth (CC, 2 cm  $\times$  4 cm) was ultrasonically treated in concentrated HCl for 2 h, and cleaned with ethanol and distilled water several times. Then, 0.09 mM of  $\text{SnCl}_4 \cdot 5\text{H}_2\text{O}$  and 0.18 mM of thioacetamide were dissolved in 30 mL of deionized water under stirring for 10 min. The mixed solution and pretreated CC were hydrothermally treated in a Teflon-lined stainless-steel autoclave at 180 °C for 24 h. The obtained  $\text{SnS}_2/\text{CC}$  was washed with deionized water and ethanol several times, and dried at 60 °C overnight. Afterwards,  $\text{SnS}_2/\text{CC}$  was treated by Ar plasma for 5 min on an AX-1000 plasma system with a radiofrequency power generator (13.56 MHz) to obtain  $\text{SnS}_{2-x}/\text{CC}$ .

### Electrochemical measurements

Electrochemical measurements were carried out on a CHI-660E electrochemical workstation. The graphite rod, Ag/AgCl and CC-loaded catalyst were used as the reference, counter and working electrodes, respectively. All potentials were referenced to reversible hydrogen electrode (RHE) by  $E \text{ (V vs. RHE)} = E \text{ (V vs. Ag/AgCl)} + 0.198 \text{ V} + 0.059 \times \text{pH}$ . The electrocatalytic NORR measurements were performed in NO saturated 0.5 M  $\text{Na}_2\text{SO}_4$  electrolyte using a gas-tight H-cell. Prior to NORR test, all the feeding gases were purified through two glass bubblers containing 4 M KOH solution and the cathodic compartment was purged with Ar for at least 30 min to remove residual oxygen[1]. During the potentiostatic testing, a flow of NO (99.99%) with a rate of 20 mL  $\text{min}^{-1}$  was continuously fed to the cathodic compartment. After electrolysis at specified potentials for 1 h, the aqueous and gas product are detected by the colorimetric methods and gas chromatography (GC), respectively.

### Determination of $\text{NH}_3$

The generated  $\text{NH}_3$  was determined by the indophenol blue method[2]. Typically, 0.5 mL of electrolyte was removed from the electrochemical reaction vessel and

diluted 10 times with deionized water. Then 2 mL of diluted solution was removed into a clean vessel followed by sequentially adding NaOH solution (2 mL, 1 M) containing  $C_7H_6O_3$  (5 wt.%) and  $C_6H_5Na_3O_7$  (5 wt.%), NaClO (1 mL, 0.05 M), and  $C_5FeN_6Na_2O$  (0.2 mL, 1wt.%) aqueous solution. After the incubation for 2 h at room temperature, the mixed solution was subjected to UV-vis measurement using the absorbance at 655 nm wavelength. The concentration-absorbance curves were calibrated by the standard  $NH_4Cl$  solution with a series of concentrations, and the  $NH_3$  yield rate and Faradaic efficiency (FE) were calculated by the following equation[3]:

$$NH_3 \text{ yield} = (c \times V) / (17 \times t \times A) \quad (1)$$

Faradaic efficiency was calculated by the following equation:

$$FE = (5 \times F \times c \times V) / (17 \times Q) \times 100\% \quad (2)$$

where  $c$  ( $\mu g \text{ mL}^{-1}$ ) is the measured  $NH_3$  concentration,  $V$  (mL) is the volume of electrolyte in the cathode chamber,  $t$  (s) is the electrolysis time and  $A$  is the surface area of CC ( $1 \times 1 \text{ cm}^2$ ),  $F$  ( $96500 \text{ C mol}^{-1}$ ) is the Faraday constant,  $Q$  (C) is the total quantity of applied electricity.

#### ***Determination of $N_2H_4$***

$N_2H_4$  in electrolyte was quantitatively determined by a Watt and Chrisp method [4]. Coloring solution was prepared by mixing 300 mL  $C_2H_5OH$ , 5.99 g  $C_9H_{11}NO$  and 30 mL HCl. Then, 5 mL color solution was added into 5 mL electrolyte. After the incubation for 20 min at room temperature, the mixed solution was subjected to UV-vis measurement using the absorbance at 455 nm wavelength. The concentration-absorbance curves were calibrated by the standard  $N_2H_4$  solution with a series of concentrations.

#### ***Determination of $NO_3^-$***

$NO_3^-$  in electrolyte was quantitatively determined by a reported method[5]. The electrolyte was collected and diluted to the detection range. 2 mL diluted electrolyte was mixed with 40  $\mu L$  1 M HCl containing 4.0  $\mu l$  0.8 wt% sulfamic acid. After the incubation for 20 min at room temperature, the mixed solution was subjected to UV-vis measurement using the absorbance at 220 nm wavelength. The concentration-absorbance curves were calibrated by the standard  $KNO_3$  solution with a series of

concentrations.

### ***Nuclear magnetic resonance measurement***

$^1\text{H}$  nuclear magnetic resonance (NMR) measurement was carried out using  $^{15}\text{NO}$  as the feed gas. After NORR electrolysis, 4 mL of electrolyte was removed from the electrochemical reaction vessel, which was concentrated to 1 mL and further acidized to pH 2. The obtained electrolyte was mixed with 0.1 mL of deuterium oxide ( $\text{D}_2\text{O}$ ) containing 100 ppm of dimethyl sulphoxide (DMSO) and 70  $\mu\text{L}$  of  $\text{D}_2\text{O}$  for NMR spectroscopy measurement (500 MHz Bruker superconducting-magnet NMR spectrometer).

### ***Characterizations***

X-ray diffraction (XRD) was conducted on a Rigaku D/max 2400 diffractometer. Transmission electron microscopy (TEM) and high-resolution transmission electron microscopy (HRTEM) were recorded on a Tecnai G<sup>2</sup> F20 microscope. X-ray photoelectron spectroscopy (XPS) analysis was collected on a PHI 5702 spectrometer. Electron paramagnetic resonance (EPR) measurements were conducted on a Bruker ESP-300 spectrometer. UV-vis absorption spectra were measured on MAPADA ULM 1912006 UV-vis spectrophotometer.

### ***Calculation details***

Spin-polarized DFT calculations were carried out using a Cambridge sequential total energy package (CASTEP). The Perdew–Burke–Ernzerhof (PBE) generalized gradient approximation (GGA) functional was used to model the exchange-correlation interactions. The DFT-D correction method with a Grimme scheme was used to describe the van der Waals interactions throughout the calculations. The electron wave functions were expanded using plane waves with a cutoff energy of 500 eV. The convergence tolerance was set to be  $1.0 \times 10^{-5}$  eV for energy and 0.02 eV  $\text{\AA}^{-1}$  for force. The Brillouin zone was sampled by  $4 \times 4 \times 1$  Monkhorst–Pack k-point mesh.  $\text{SnS}_2$  (001) was modeled by a  $2 \times 2$  supercell consisting of 16 Sn atoms and 32 S atoms. One central S atom was removed to construct the S vacancy with the S-vacancy density of 3.1 at%. A vacuum region of 15  $\text{\AA}$  was used to separate adjacent slabs. The adsorption energy ( $\Delta E$ ) is calculated as

$$\Delta E = E_{\text{ads/slab}} - E_{\text{ads}} - E_{\text{slab}} \quad (3)$$

where  $E_{\text{ads/slab}}$ ,  $E_{\text{ads}}$  and  $E_{\text{slab}}$  are the total energies for adsorbed species on slab, adsorbed species and isolated slab, respectively.

The computational hydrogen electrode (CHE) model was adopted to calculate the Gibbs free energy change ( $\Delta G$ ) for each elementary step as follows:

$$\Delta G = \Delta E + \Delta \text{ZPE} - T\Delta S \quad (4)$$

where  $\Delta E$  is the adsorption energy,  $\Delta \text{ZPE}$  is the zero-point energy difference and  $T\Delta S$  is the entropy difference between the gas phase and adsorbed state. The entropies of free gases were acquired from the NIST database.

Molecular dynamics (MD) simulations were carried out using a force field type of Universal. The electrolyte system was geometrically optimized by setting the convergence tolerance of  $2.0 \times 10^{-5}$  kcal/mol for energy and 0.001 kcal/mol/Å for force. The non-bond interaction was processed by Ewald with accuracy of  $10^{-5}$  Kcal/mol and the repulsive cutoff was chosen as 12 Å. The electrolyte system was set up by randomly placing 1000 H<sub>2</sub>O, 50 NO molecules in the simulation box. After geometry optimization, the MD simulations were performed under the universal field with the total simulation time of 5 ns at a time step of 1 fs.

The radial distribution function (RDF) is calculated as

$$g(r) = \frac{dN}{4\pi\rho r^2 dr} \quad (5)$$

where  $dN$  is the amount of NO in the shell between the central particle  $r$  and  $r+dr$ ,  $\rho$  is the number density of NO.

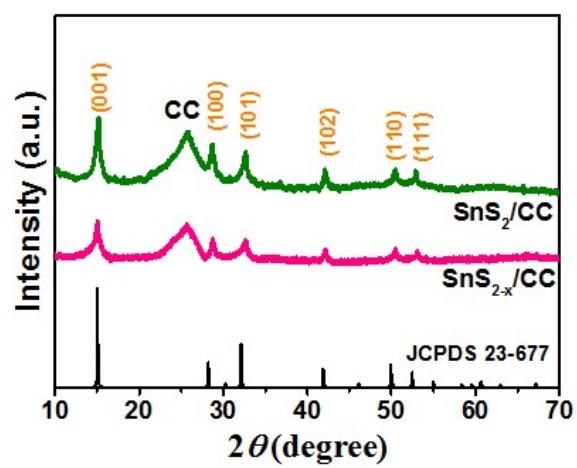

Fig. S1. XRD patterns of SnS<sub>2</sub>/CC and SnS<sub>2-x</sub>/CC.

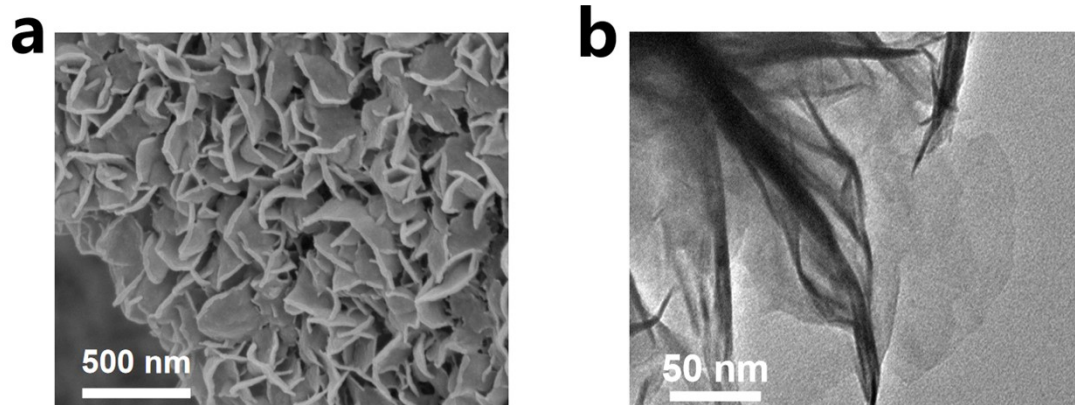

Fig. S2. (a) SEM and (b) TEM images of SnS<sub>2</sub> nanosheets.

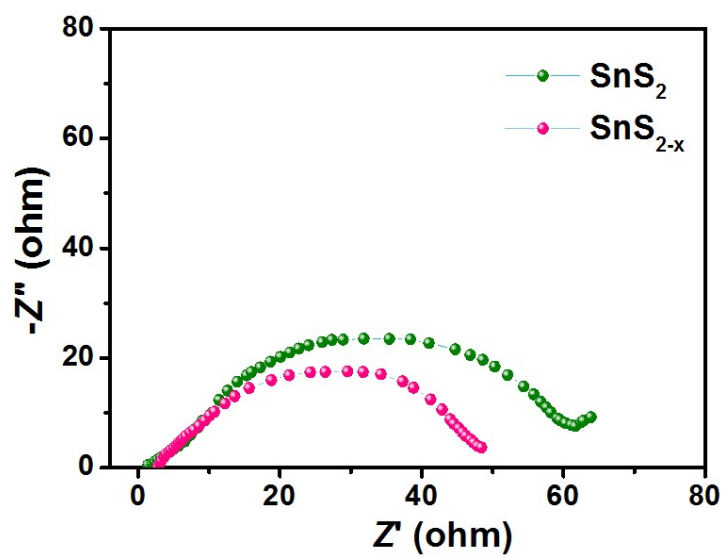

Fig. S3. Electrochemical impedance spectra of  $\text{SnS}_2/\text{CC}$  and  $\text{SnS}_{2-x}/\text{CC}$ .

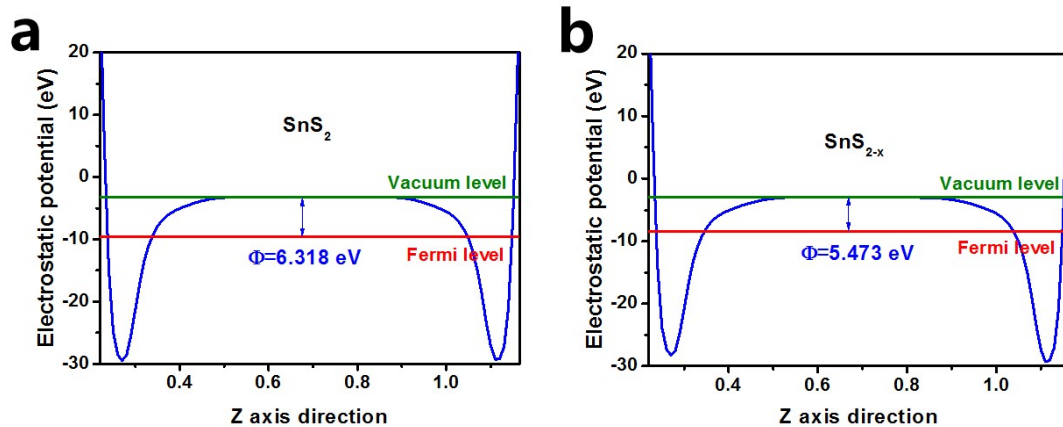

Fig. S4. Average potential profiles along c-axis direction for calculating the work functions of (a)  $\text{SnS}_2$  and (b)  $\text{SnS}_{2-x}$ .

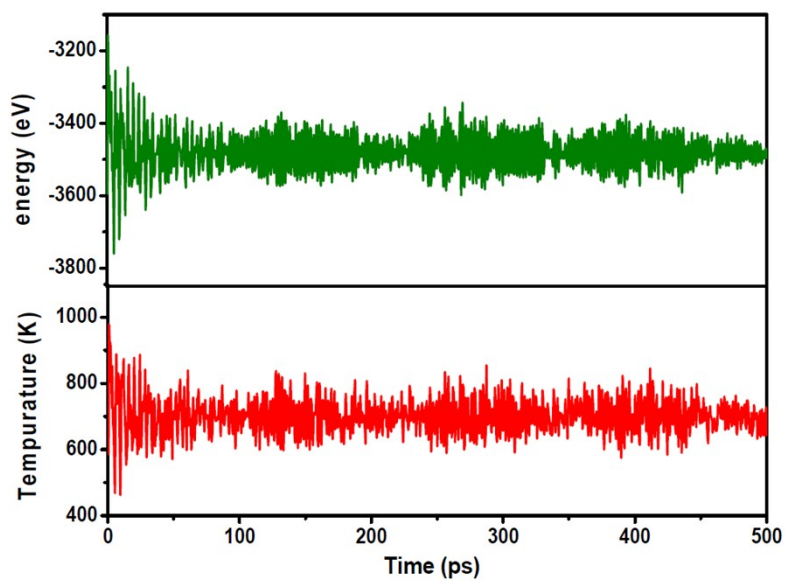

Fig. S5. Variations of energy and temperature during the AIMD simulation for assessing the thermodynamic stability of  $\text{SnS}_{2-x}$ .

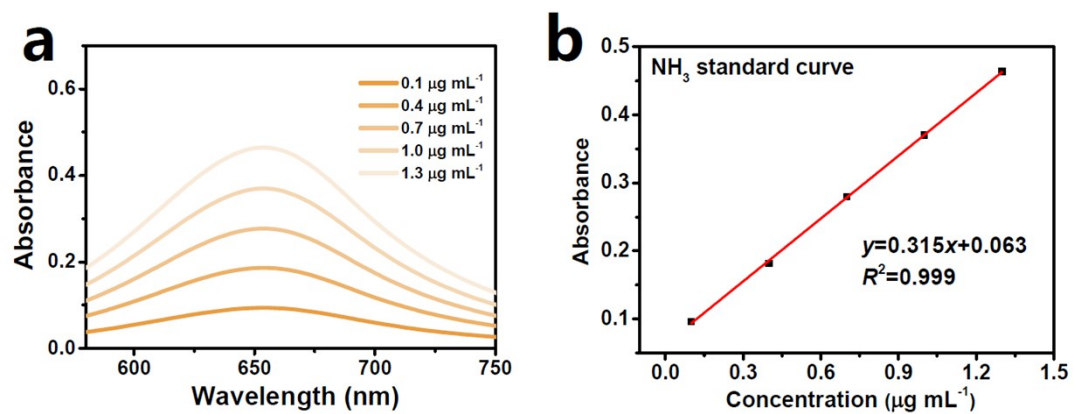

Fig. S6. (a) UV-vis absorption spectra of  $\text{NH}_4^+$  assays after incubated for 2 h at ambient conditions. (b) Calibration curve used for the calculation of  $\text{NH}_3$  concentrations.

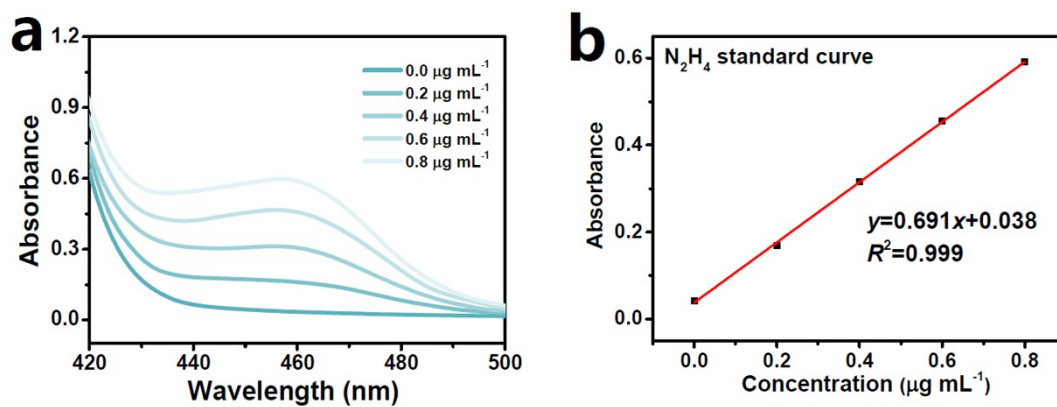

Fig. S7. (a) UV-vis absorption spectra of  $N_2H_4$  assays after incubated for 20 min at ambient conditions. (b) Calibration curve used for calculation of  $N_2H_4$  concentrations.

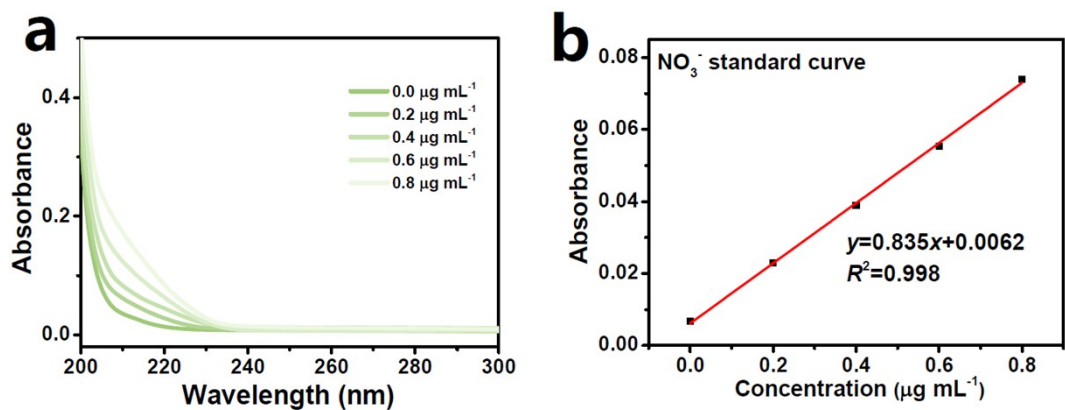

Fig. S8. (a) UV-vis absorption spectra of  $\text{NO}_3^-$  assays after incubated for 20 min at ambient conditions. (b) Calibration curve used for calculation of  $\text{NO}_3^-$  concentrations.

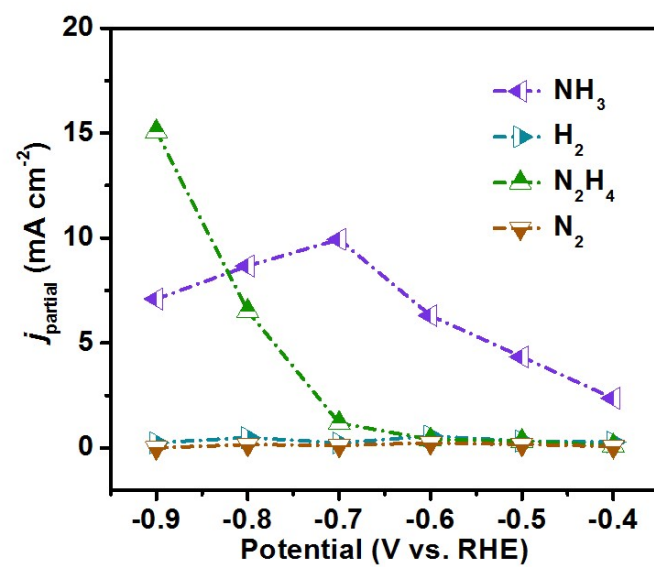

Fig. S9. Partial current densities of various products at different potentials.

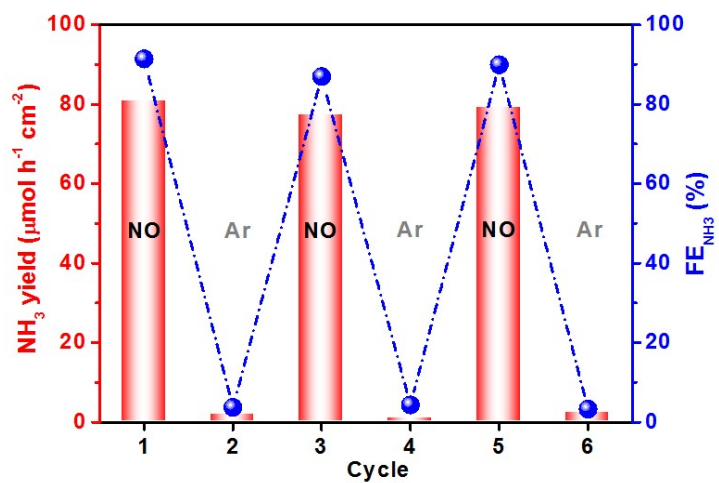

Fig. S10. NO–Ar gas switching experiment on SnS<sub>2-x</sub>/CC at -0.7 V.

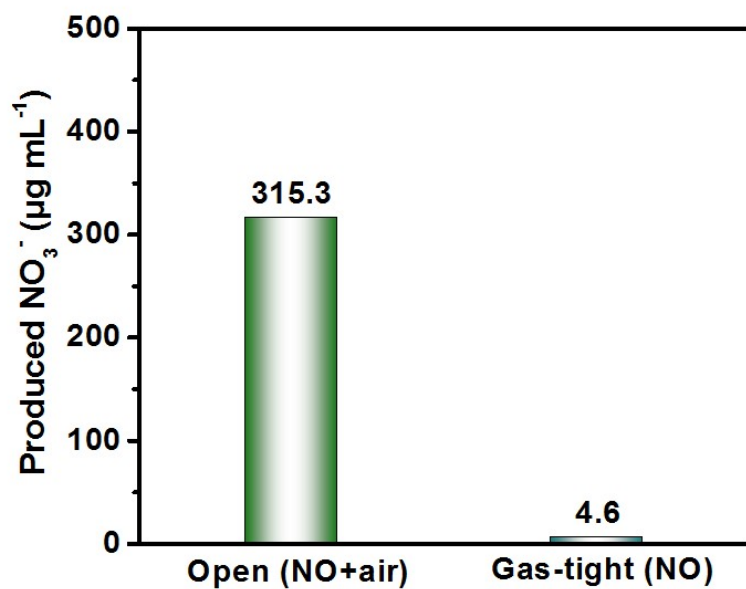

Fig. S11. Amounts of produced  $\text{NO}_3^-$  in open and gas-tight electrolytic cells.

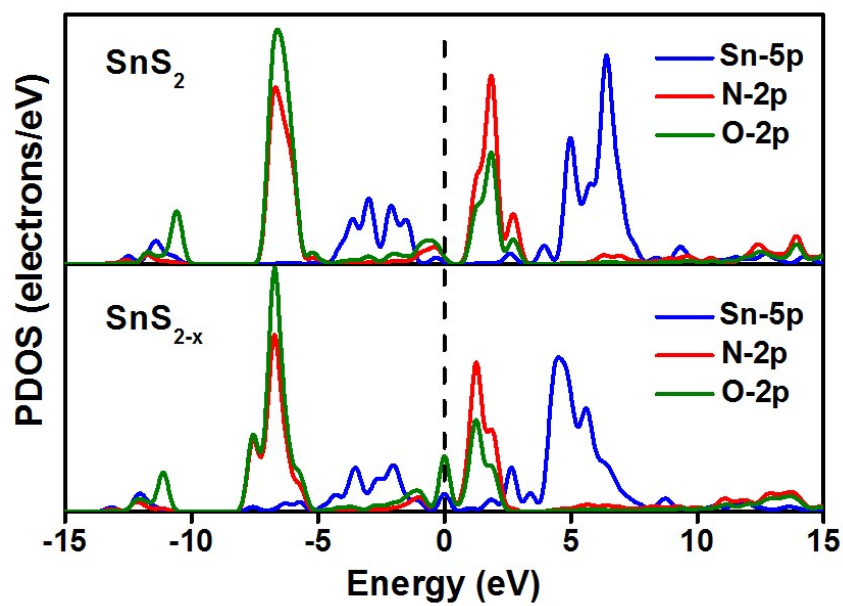

Fig. S12. PDOS profiles of absorbed NO on  $\text{SnS}_2$  and  $\text{SnS}_{2-x}$ .

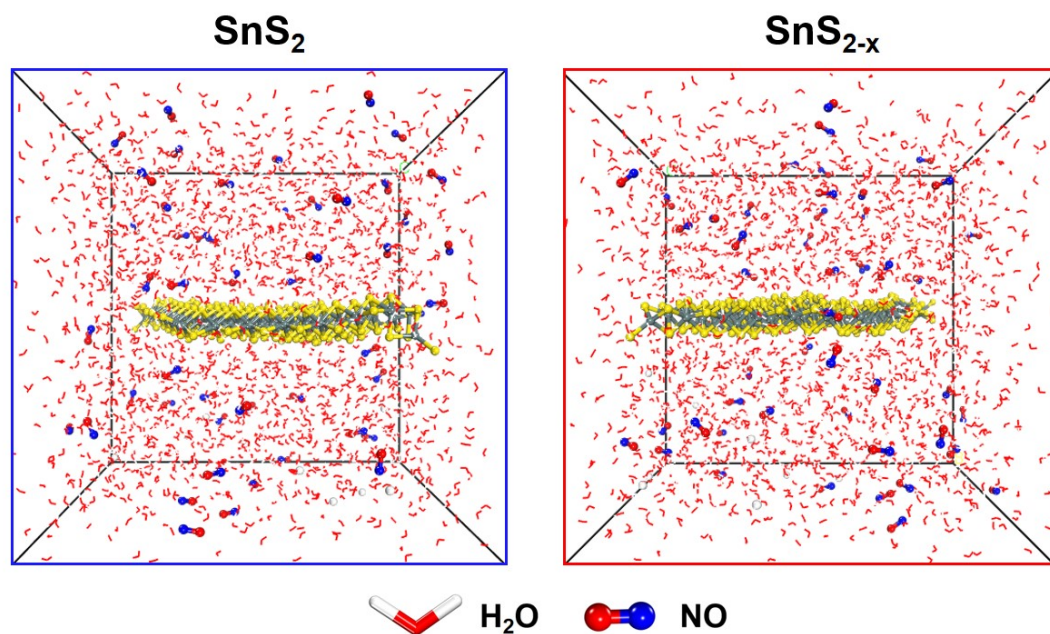

Fig. S13. Snapshots of the initial states for the dynamic process of NO adsorption on SnS<sub>2</sub> and SnS<sub>2-x</sub> before MD simulations.

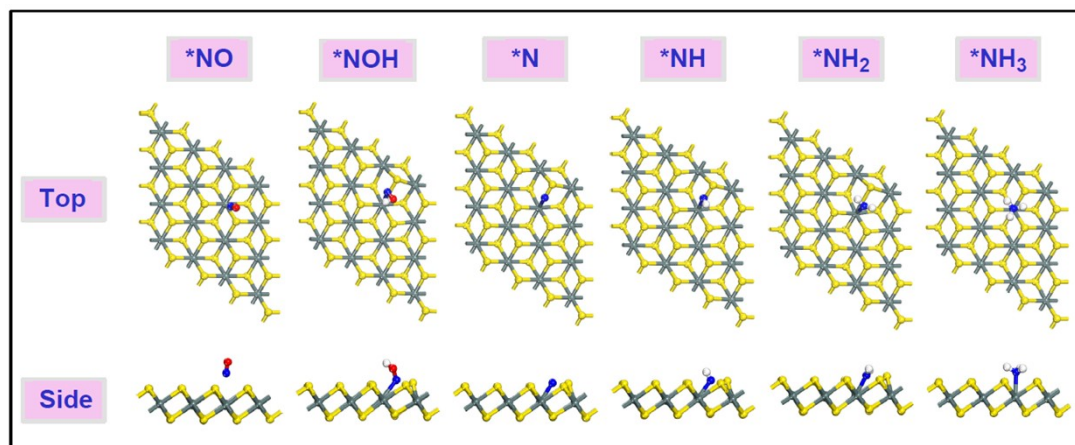

Fig. S14. The optimized atomic structures of the reaction intermediates on  $\text{SnS}_2$ .

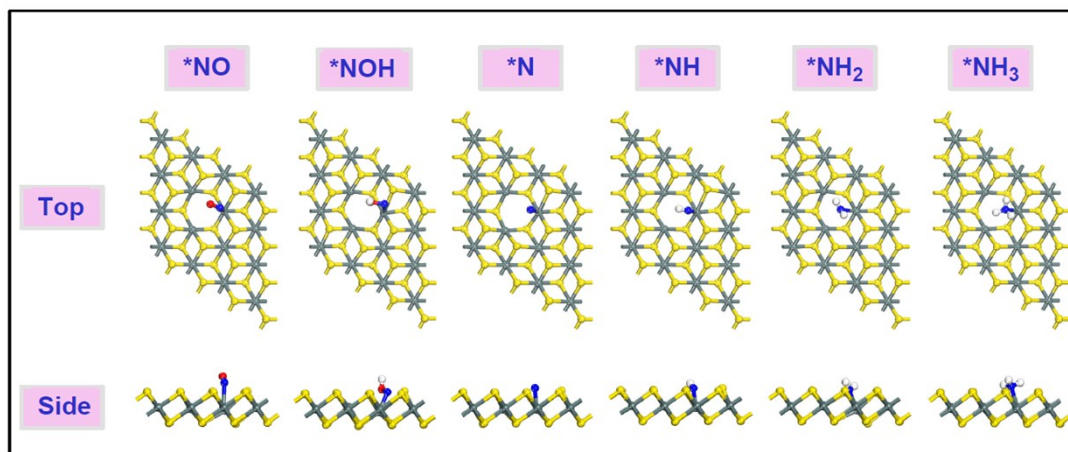

Fig. S15. The optimized atomic structures of the reaction intermediates on  $\text{SnS}_{2-x}$ .

Table S1. Comparison of the optimum  $\text{NH}_3$  yield and  $\text{FE}_{\text{NH}_3}$  for the recently reported state-of-the-art NORR electrocatalysts at ambient conditions.

| Catalyst                                           | Electrolyte                     | $\text{NH}_3$<br>yield rate<br>( $\mu\text{mol h}^{-1} \text{cm}^{-2}$ ) | $\text{FE}_{\text{NH}_3}$<br>(%) | Potential<br>(V vs. RHE) | Ref.                 |
|----------------------------------------------------|---------------------------------|--------------------------------------------------------------------------|----------------------------------|--------------------------|----------------------|
| $\text{Ni}_2\text{P}/\text{CP}$                    | 0.1 M HCl                       | 33.47                                                                    | 76.9                             | -0.2                     | [6]                  |
| $\text{Ru}_{0.05}\text{Cu}_{0.95}$                 | 0.05 M $\text{Na}_2\text{SO}_4$ | 17.68                                                                    | 64.9                             | -0.5                     | [7]                  |
| $\text{MoS}_2/\text{GF}$                           | 0.1 M HCl                       | 99.6                                                                     | 76.6                             | 0.1                      | [8]                  |
| $\text{MnO}_{2-x}$<br>NA/TM                        | 0.2 M $\text{Na}_2\text{SO}_4$  | 9.9                                                                      | 82.8                             | -0.7                     | [9]                  |
| $\text{Ni}@\text{NC}$                              | 0.1 M HCl                       | 34.6                                                                     | 72.3                             | 0.16                     | [10]                 |
| Single atom<br>Nb                                  | 0.1 M HCl                       | 295.2                                                                    | 77.1                             | -0.6                     | [11]                 |
| a- $\text{B}_{2.6}\text{C}@\text{TiO}_2/\text{Ti}$ | 0.1 M $\text{Na}_2\text{SO}_4$  | 216.4                                                                    | 87.6                             | -0.9                     | [12]                 |
| $\text{CoP}/\text{TM}$                             | 0.2 M $\text{Na}_2\text{SO}_4$  | 47.22                                                                    | 88.3                             | -0.2                     | [13]                 |
| $\text{CoS}_{1-x}/\text{CP}$                       | 0.2 M $\text{Na}_2\text{SO}_4$  | 44.67                                                                    | 53.62                            | -0.4                     | [14]                 |
| Bi NDs                                             | 0.1 M $\text{Na}_2\text{SO}_4$  | 70.2                                                                     | 89.2                             | -0.5                     | [15]                 |
| $\text{SnS}_{2-x}$                                 | 0.5 M $\text{Na}_2\text{SO}_4$  | 78.6                                                                     | 90.3                             | -0.7                     | <b>This<br/>Work</b> |

Table S2. ZPE and TΔS energies values of various species.

| Species          | ΔZPE (eV) | TΔS (eV) |
|------------------|-----------|----------|
| *NO              | 0.18      | 0.13     |
| *NOH             | 0.47      | 0.14     |
| *N               | 0.08      | 0.03     |
| *NH              | 0.36      | 0.05     |
| *NH <sub>2</sub> | 0.69      | 0.08     |
| *NH <sub>3</sub> | 1.04      | 0.13     |
| *H               | 0.05      | 0.2      |

## Supplementary references

- [1]. L. Zhang, J. Liang, Y. Wang, T. Mou, Y. Lin, L. Yue, T. Li, Q. Liu, Y. Luo, N. Li, B. Tang, Y. Liu, S. Gao, A. A. Alshehri, X. Guo, D. Ma and X. Sun, *Angew. Chem. Int. Edit.*, 2021, **60**, 25263-25268.
- [2]. P. Li, Z. Jin, Z. Fang and G. Yu, *Energy Environ. Sci.*, 2021, **14**, 3522-3531.
- [3]. Y. Wang, C. Wang, M. Li, Y. Yu and B. Zhang, *Chem. Soc. Rev.*, 2021, **50**, 6720-6733.
- [4]. G. W. Watt and J. D. Chrisp, *Anal. Chem.*, 1952, **24**, 2006-2008.
- [5]. L. C. Green, D. A. Wagner, J. Glogowski, P. L. Skipper, J. S. Wishnok and S. R. J. A. b. Tannenbaum, *Anal. Biochem.*, 1982, **126**, 131-138.
- [6]. T. Mou, J. Liang, Z. Ma, L. Zhang, Y. Lin, T. Li, Q. Liu, Y. Luo, Y. Liu, S. Gao, H. Zhao, A. M. Asiri, D. Ma and X. Sun, *J. Mater. Chem. A*, 2021, **9**, 24268-24275.
- [7]. J. Shi, C. Wang, R. Yang, F. Chen, N. Meng, Y. Yu and B. Zhang, *Sci. China Chem.*, 2021, **64**, 1493-1497.
- [8]. L. Zhang, J. Liang, Y. Wang, T. Mou, Y. Lin, L. Yue, T. Li, Q. Liu, Y. Luo, N. Li, B. Tang, Y. Liu, S. Gao, A. A. Alshehri, X. Guo, D. Ma and X. Sun, *Angew. Chem. Int. Ed.*, 2021, **133**, 25467-25472.
- [9]. Z. Li, Z. Ma, J. Liang, Y. Ren, T. Li, S. Xu, Q. Liu, N. Li, B. Tang, Y. Liu, S. Gao, A. A. Alshehri, D. Ma, Y. Luo, Q. Wu and X. Sun, *Mater. Today Phys.*, 2022, **22**, 100586.
- [10]. S. Sethuram Markandaraj, T. Muthusamy and S. Shanmugam, *Adv. Sci.*, 2022, **9**, 2201410.
- [11]. X. Peng, Y. Mi, H. Bao, Y. Liu, D. Qi, Y. Qiu, L. Zhuo, S. Zhao, J. Sun, X. Tang, J. Luo and X. Liu, *Nano Energy*, 2020, **78**, 105321.
- [12]. J. Liang, P. Liu, Q. Li, T. Li, L. Yue, Y. Luo, Q. Liu, N. Li, B. Tang, A. A. Alshehri, I. Shakir, P. O. Agboola, C. Sun and X. Sun, *Angew. Chem. Int. Ed.*, 2022, **61**, e202202087.
- [13]. J. Liang, W.-F. Hu, B. Song, T. Mou, L. Zhang, Y. Luo, Q. Liu, A. A. Alshehri, M. S. Hamdy, L.-M. Yang and X. Sun, *Inorg. Chem. Front.*, 2022, **9**, 1366-1372.
- [14]. L. Zhang, Q. Zhou, J. Liang, L. Yue, T. Li, Y. Luo, Q. Liu, N. Li, B. Tang, F. Gong, X. Guo and X. Sun, *Inorg. Chem. Front.*, 2022, **61**, 8096-8102.
- [15]. Y. Lin, J. Liang, H. Li, L. Zhang, T. Mou, T. Li, L. Yue, Y. Ji, Q. Liu, Y. Luo, N. Li, B. Tang, Q. Wu, M. S. Hamdy, D. Ma and X. Sun, *Mater. Today Phys.*, 2022, **22**.
